# Supplementary material for: Outcomes of Hip Arthroscopy in the Setting of Concomitant Symptomatic Lumbosacral Spine Pathology: A Matched Control Study With Minimum 24-Month Follow-up
Source: PubMed Central journal article supplement — Am J Sports Med. 2023 Sep 15;51(12):3268–79. doi: 10.1177/03635465231197374 (PMC10571439; doi:10.1177/03635465231197374), 2023-09-15
Supplement: sj-pdf-1-ajs-10.1177_03635465231197374.pdf [file sj-pdf-1-ajs-10.1177_03635465231197374.pdf]

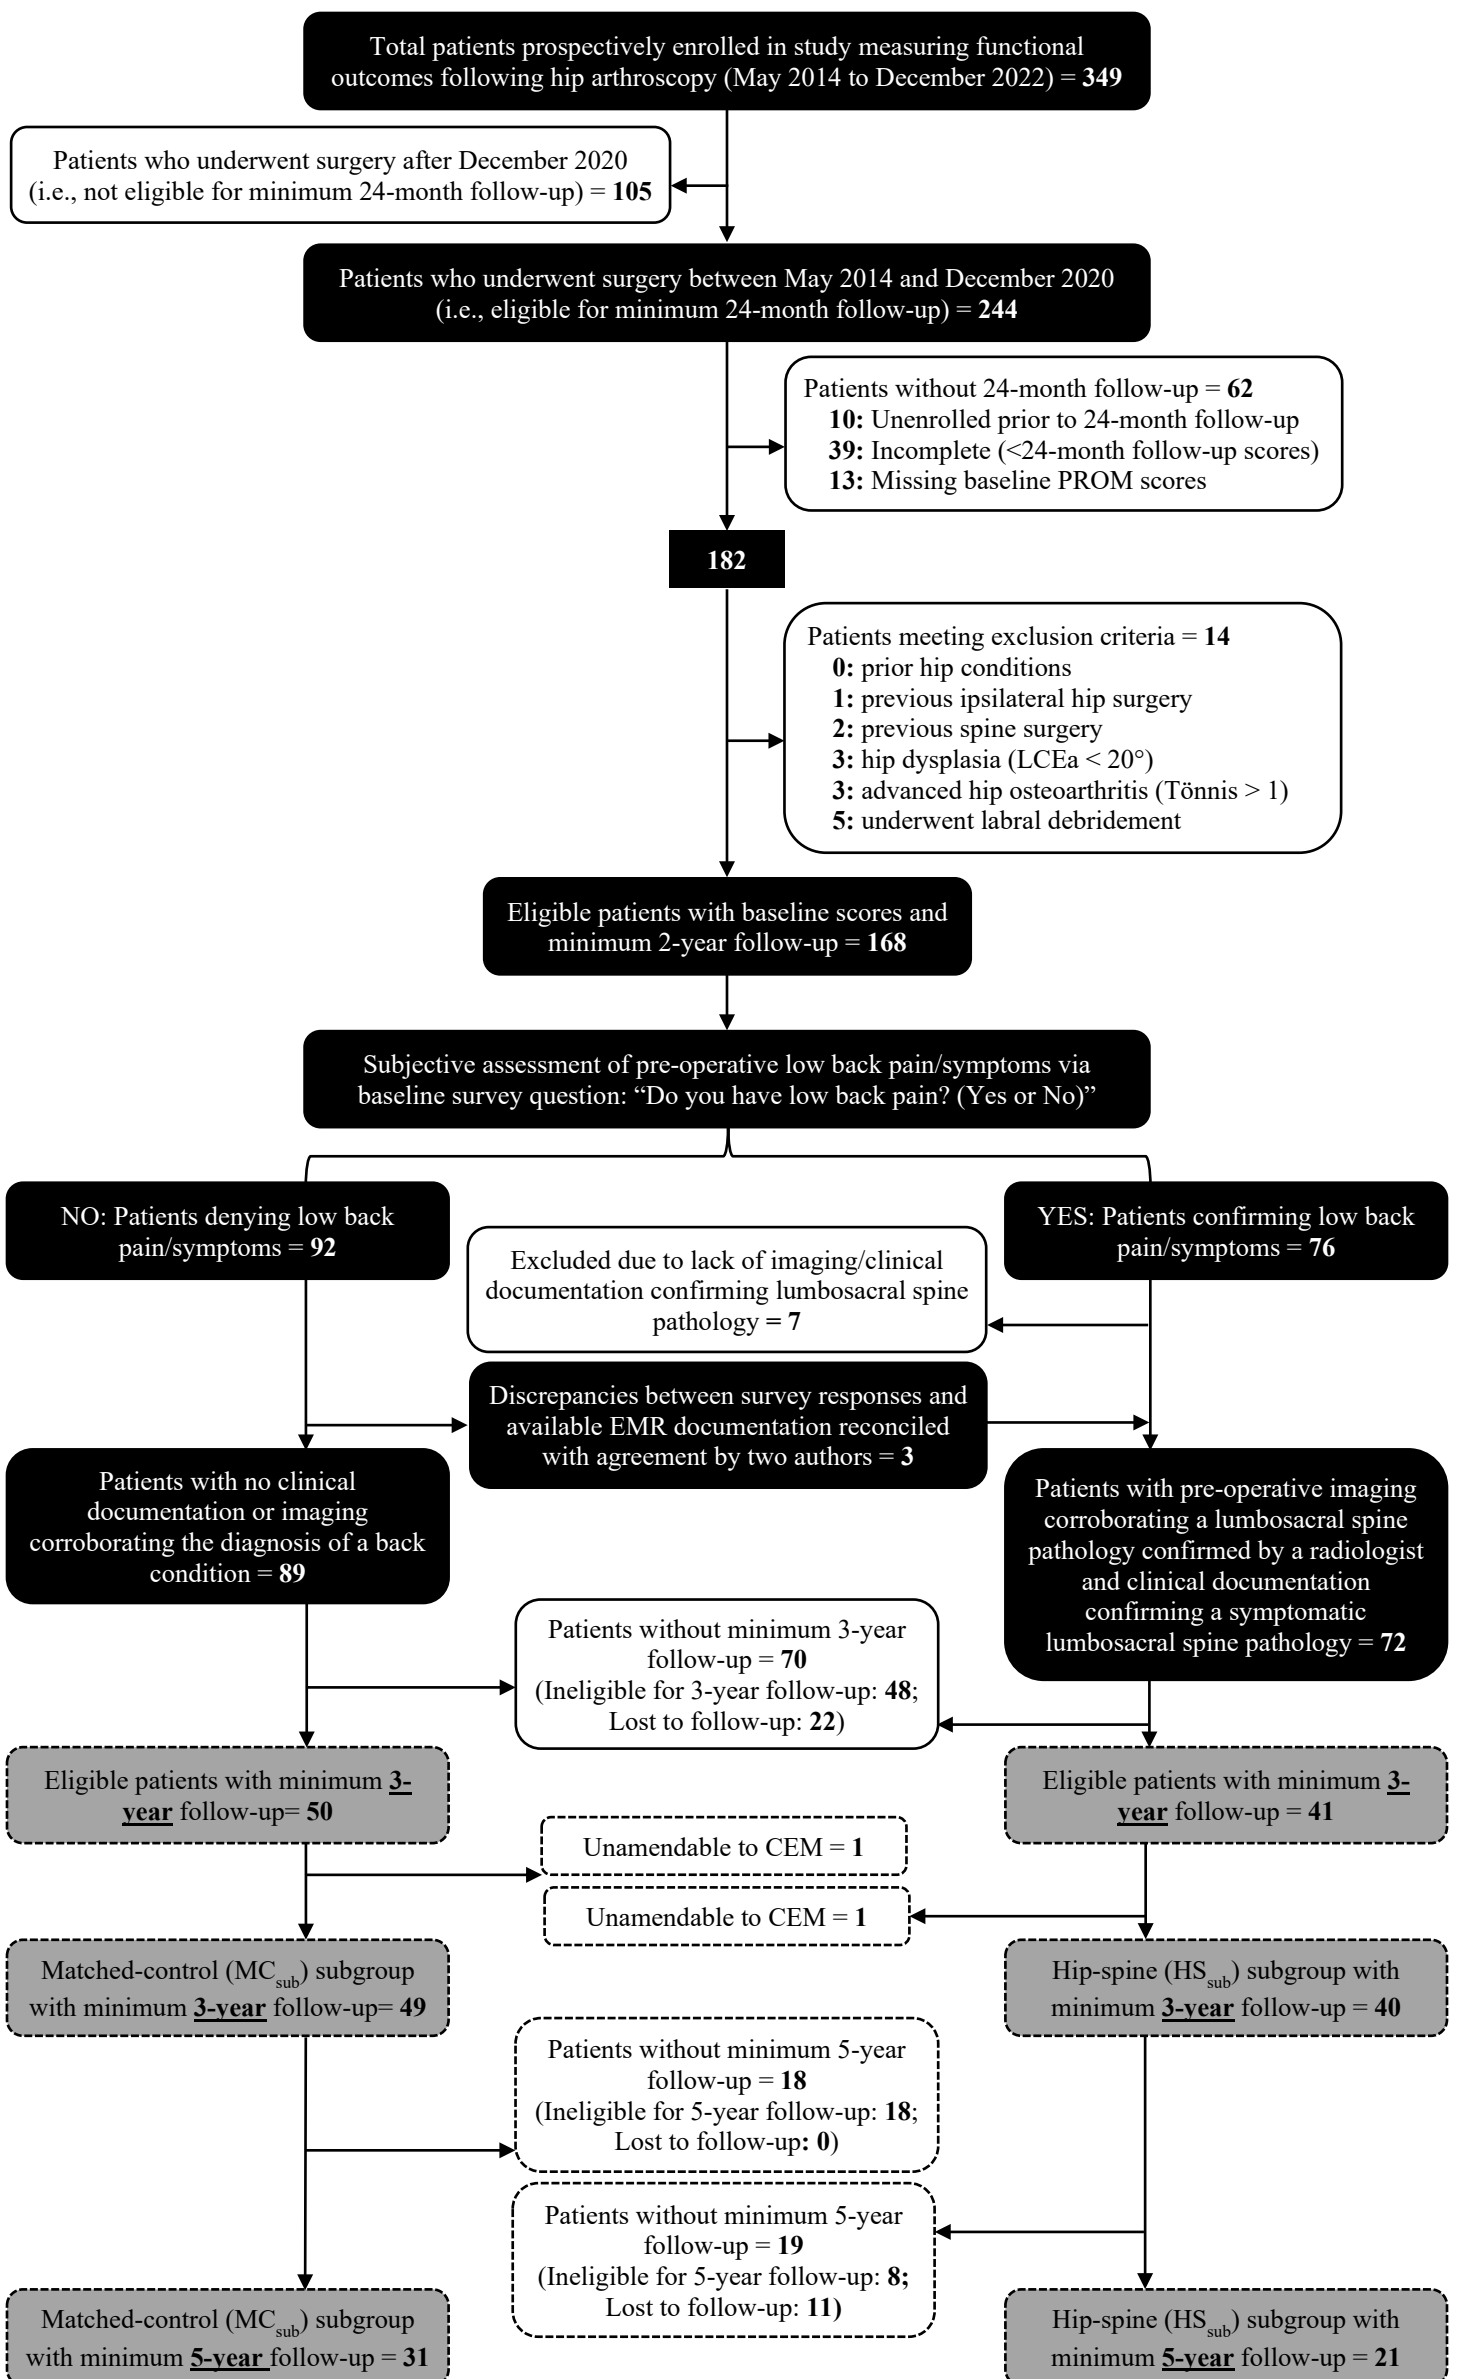

**Figure A1.** Flowchart detailing eligibility/selection criteria of the subgroup with available 3- or 5-year follow-up. PROM, patient-reported outcome metric; LCEa, lateral center edge angle; CEM, coarsened-exact matching.

**Table AI.** Patient Demographic Characteristics by Subgroup with Minimum 3-Year Follow-Up

|                                                | <b>HS<sub>Sub</sub> Cohort<br/>(n = 40)</b> | <b>MC<sub>Sub</sub> Cohort<br/>(n = 49)</b> | <b>P Value</b> |
|------------------------------------------------|---------------------------------------------|---------------------------------------------|----------------|
| <b>Age</b> (years), mean (95% CI)              | 40.6 (37.3, 43.9)                           | 38.2 (34.8, 41.6)                           | .329           |
| <b>Sex</b> , n (%)                             |                                             |                                             | .271           |
| Male                                           | 19 (47.5%)                                  | 29 (59.2%)                                  |                |
| Female                                         | 21 (52.5%)                                  | 20 (40.8%)                                  |                |
| <b>BMI</b> (kg/m <sup>2</sup> ), mean (95% CI) | 25.4 (24.4, 26.5)                           | 25 (23.9, 26.1)                             | .598           |
| <b>Laterality</b> , n (%)                      |                                             |                                             | .449           |
| Left                                           | 22 (55.0%)                                  | 23 (46.9%)                                  |                |
| Right                                          | 18 (45.0%)                                  | 26 (53.1%)                                  |                |
| <b>α angle</b> , mean (95% CI)                 | 52.4 (47.6, 57.1)                           | 52.7 (48.2, 57.3)                           | .914           |
| <b>LCEa</b> , mean (95% CI)                    | 36.8 (34.8, 38.7)                           | 36.8 (35.3, 38.3)                           | .984           |
| <b>Tönnis Angle</b> , mean (95% CI)            | 7.4 (6.0, 8.8)                              | 6.9 (5.5, 8.3)                              | .626           |
| <b>Tönnis Grade</b> , n (%)                    |                                             |                                             | .821           |
| 0                                              | 17 (42.5%)                                  | 22 (44.9%)                                  |                |
| 1                                              | 23 (57.5%)                                  | 27 (55.1%)                                  |                |
| <b>Type of FAI</b> , n (%)                     |                                             |                                             | .362           |
| Pincer deformity                               | 24 (60.0%)                                  | 27 (55.1%)                                  |                |
| CAM deformity                                  | 0 (0%)                                      | 3 (6.1%)                                    |                |
| CAM and Pincer                                 | 16 (40.0%)                                  | 19 (38.8%)                                  |                |
| <b>Lumbar Spine Pathology</b>                  |                                             |                                             |                |
| Degenerative Disk Disease/Spondylosis          | 17 (42.5%)                                  | -                                           |                |
| Degenerative Scoliosis                         | 6 (15.0%)                                   | -                                           |                |
| Lumbar Disc Herniation                         | 6 (15.0%)                                   | -                                           |                |
| Foraminal Stenosis                             | 8 (20.0%)                                   | -                                           |                |
| Spondylolysis                                  | 1 (2.5%)                                    | -                                           |                |
| Spondylolisthesis                              | 2 (5.0%)                                    | -                                           |                |

HS<sub>Sub</sub>, hip-spine subgroup; MC<sub>Sub</sub>, matched control subgroup; CI, confidence interval; BMI, body mass index; LCEa, lateral center edge angle; FAI, femoroacetabular impingement.

**Table A2.** Intraoperative Findings and Procedures Performed by Subgroup with Minimum 3-Year Follow-Up

|                                           | <b>HS<sub>Sub</sub> Cohort<br/>(n = 40)</b> | <b>MC<sub>Sub</sub> Cohort<br/>(n = 49)</b> | <b>P Value</b> |
|-------------------------------------------|---------------------------------------------|---------------------------------------------|----------------|
| <b>Labrum Condition, n (%)</b>            |                                             |                                             | .620           |
| Normal                                    | 0 (0%)                                      | 0 (0%)                                      |                |
| Degeneration                              | 9 (22.5%)                                   | 14 (28.6%)                                  |                |
| Full Thickness Tear                       | 21 (52.5%)                                  | 27 (55.1%)                                  |                |
| Detachment                                | 9 (22.5%)                                   | 8 (16.3%)                                   |                |
| Ossification                              | 1 (2.5%)                                    | 0 (0%)                                      |                |
| <b>Outerbridge Grade, n (%)</b>           |                                             |                                             | .562           |
| 0                                         | 0 (0%)                                      | 0 (0%)                                      |                |
| 1                                         | 2 (5.0%)                                    | 2 (4.1%)                                    |                |
| 2                                         | 8 (20.0%)                                   | 14 (28.6%)                                  |                |
| 3                                         | 21 (52.5%)                                  | 27 (55.1%)                                  |                |
| 4                                         | 9 (22.5%)                                   | 6 (12.2%)                                   |                |
| <b>Chondrolabral Junction, n (%)</b>      |                                             |                                             | .452           |
| Normal                                    | 0 (0%)                                      | 2 (4.1%)                                    |                |
| Malacia                                   | 4 (10.0%)                                   | 2 (4.1%)                                    |                |
| Debonding                                 | 3 (7.5%)                                    | 4 (8.2%)                                    |                |
| Cleavage                                  | 21 (52.5%)                                  | 31 (63.3%)                                  |                |
| Defect                                    | 12 (30.0%)                                  | 10 (20.4%)                                  |                |
| <b>Chondral Flap, n (%)</b>               | 13 (32.5%)                                  | 14 (28.6%)                                  | .688           |
| <b>Chondral Treatment, n (%)</b>          |                                             |                                             | .855           |
| None                                      | 22 (55.0%)                                  | 26 (53.1%)                                  |                |
| BMAC Augmentation                         | 18 (45.0%)                                  | 23 (46.9%)                                  |                |
| Microfracture                             | 0 (0%)                                      | 0 (0%)                                      |                |
| <b>Labral Management, n (%)</b>           |                                             |                                             | .402           |
| Repair Alone                              | 4 (10.0%)                                   | 2 (4.1%)                                    |                |
| Reconstruction with Capsular Augmentation | 36 (90.0%)                                  | 47 (95.9%)                                  |                |
| <b>Osteoplasty Performed, n (%)</b>       |                                             |                                             | .362           |
| Acetabuloplasty                           | 24 (60.0%)                                  | 27 (55.1%)                                  |                |
| Femoroplasty                              | 0 (0%)                                      | 3 (6.1%)                                    |                |
| Femoroacetabular Osteoplasty              | 16 (40.0%)                                  | 19 (38.8%)                                  |                |

HS<sub>Sub</sub>, hip-spine subgroup; MC<sub>Sub</sub>, matched control subgroup; BMAC, bone marrow aspirate concentrate.

**Table A3.** Mean PROM/Pain Scores and Interval Improvements at Baseline through 3-Year and Available 5-Year Follow-Up\*

|                     | HS <sub>Sub</sub> Cohort (n = 40) |                          | MC <sub>Sub</sub> Cohort (n = 49) |                          | Significance       |                          |
|---------------------|-----------------------------------|--------------------------|-----------------------------------|--------------------------|--------------------|--------------------------|
|                     | Mean                              | Improvement <sup>‡</sup> | Mean                              | Improvement <sup>‡</sup> | P <sub>Mean</sub>  | P <sub>Improvement</sub> |
| <b>Preoperative</b> |                                   |                          |                                   |                          |                    |                          |
| <b>n</b>            | <b>40</b>                         |                          | <b>49</b>                         |                          |                    |                          |
| mHHS                | 59.9 (55.9, 63.9)                 | -                        | 63.2 (59.6, 66.8)                 | -                        | .235               | -                        |
| HOS-ADL             | 69.6 (65.7, 73.6)                 | -                        | 74.0 (70.4, 77.5)                 | -                        | .111               | -                        |
| HOS-SS              | 38.6 (30.6, 46.6)                 | -                        | 43.3 (36.2, 50.5)                 | -                        | .387               | -                        |
| NAHS                | 60.7 (56.7, 64.7)                 | -                        | 69.8 (66.3, 73.3)                 | -                        | <.001 <sup>†</sup> | -                        |
| iHOT-33             | 35.4 (29.2, 41.6)                 | -                        | 45.6 (40.2, 51.1)                 | -                        | .016 <sup>†</sup>  | -                        |
| VAS                 | 6.0 (5.4, 6.6)                    | -                        | 4.5 (3.9, 5.1)                    | -                        | <.001 <sup>†</sup> | -                        |
| <b>3 Years</b>      |                                   |                          |                                   |                          |                    |                          |
| <b>n</b>            | <b>28</b>                         |                          | <b>31</b>                         |                          |                    |                          |
| mHHS                | 82.1 (77.6, 86.6)                 | 21.8 (16.6, 26.9)        | 90.2 (86.0, 94.5)                 | 27.3 (22.5, 32.0)        | .010 <sup>†</sup>  | .125                     |
| HOS-ADL             | 88.3 (83.8, 92.8)                 | 18.2 (12.2, 24.2)        | 91.0 (86.9, 95.2)                 | 17.1 (11.6, 22.5)        | .384               | .784                     |
| HOS-SS              | 75.3 (66.3, 84.3)                 | 36.3 (26.4, 46.1)        | 78.1 (69.8, 86.4)                 | 34.9 (25.9, 43.9)        | .651               | .842                     |
| NAHS                | 85.6 (81.2, 90.1)                 | 24.4 (18.8, 30.0)        | 90.2 (86.0, 94.3)                 | 20.2 (15.1, 25.2)        | .147               | .275                     |
| iHOT-33             | 71.4 (64.4, 78.3)                 | 35.3 (27.3, 43.3)        | 81.3 (75.0, 87.6)                 | 36.0 (28.9, 43.2)        | .039 <sup>†</sup>  | .896                     |
| VAS                 | 2.7 (1.9, 3.4)                    | -3.3 (-4.3, -2.3)        | 1.3 (0.6, 2.0)                    | -3.1 (-4.0, -2.2)        | .010 <sup>†</sup>  | .746                     |
| <b>5 Years</b>      |                                   |                          |                                   |                          |                    |                          |
| <b>n</b>            | <b>21</b>                         |                          | <b>31</b>                         |                          |                    |                          |
| mHHS                | 86.8 (81.8, 91.9)                 | 27.3 (21.7, 32.8)        | 87.7 (83.4, 91.9)                 | 24.4 (19.6, 29.2)        | .797               | .441                     |
| HOS-ADL             | 92.6 (87.6, 97.6)                 | 23.2 (17.0, 29.4)        | 92.5 (88.3, 96.7)                 | 18.4 (13.0, 23.9)        | .963               | .262                     |
| HOS-SS              | 77.8 (68.0, 87.6)                 | 39.4 (28.8, 49.9)        | 80.4 (72.1, 88.7)                 | 37.1 (28.1, 46.2)        | .693               | .752                     |
| NAHS                | 89.2 (84.3, 94.1)                 | 28.9 (23.0, 34.7)        | 90.4 (86.3, 94.6)                 | 20.9 (15.8, 26.0)        | .712               | .045 <sup>†</sup>        |
| iHOT-33             | 77.1 (69.6, 84.7)                 | 42.3 (33.9, 50.7)        | 83.3 (77.0, 89.6)                 | 37.6 (30.5, 44.8)        | .221               | .412                     |
| VAS                 | 1.9 (1.1, 2.8)                    | -4.2 (-5.3, -3.1)        | 1.4 (0.7, 2.1)                    | -3.1 (-4.1, -2.2)        | .321               | .153                     |

\*Patient reported outcome scores and interval improvements are reported as mean (95% confidence interval). <sup>†</sup>A significant difference between groups. <sup>‡</sup>Improvements reported at each timepoint relative to preoperative, baseline score. HS<sub>Sub</sub>, hip-spine subgroup; MC<sub>Sub</sub>, matched control subgroup; mHHS, modified Harris Hip Score; HOS-ADL, Hip Outcome Score–Activities of Daily Living; HOS-SS, Hip Outcome Score–Sports Subscale; NAHS, Non-Arthritic Hip Score; iHOT-33, International Hip Outcome Tool-33; VAS, visual analog scale.

**Table A4.** Weighted Differences in Interval PROM/Pain Score Improvement between Patients with (HS<sub>sub</sub>) and without (MC<sub>sub</sub>) Hip-Spine Syndrome from Baseline through Available 5-Year Follow-Up\*

| <b>PROM</b> | <b>Weighted Difference in Average Improvement (95% CI)<sup>†</sup></b> | <b>P value</b> |
|-------------|------------------------------------------------------------------------|----------------|
| mHHS        | -3.8 (-9.8, 2.2)                                                       | 0.217          |
| HOS-ADL     | -1.3 (-8.7, 6.2)                                                       | 0.733          |
| HOS-SS      | 2.2 (-9.2, 13.6)                                                       | 0.704          |
| NAHS        | 3.6 (-3.3, 10.4)                                                       | 0.300          |
| iHOT-33     | 3.2 (-6.1, 12.5)                                                       | 0.496          |
| VAS         | 0.1 (-1.2, 1.3)                                                        | 0.906          |

\*Weighted differences in improvements are reported as mean (95% confidence interval). <sup>†</sup>Reference group: matched control cohort. PROM, patient-reported outcome metric; HS<sub>sub</sub>, hip-spine subgroup; MC<sub>sub</sub>, matched control subgroup; CI, confidence interval; mHHS, modified Harris Hip Score; HOS-ADL, Hip Outcome Score-Activities of Daily Living; HOS-SS, Hip Outcome Score-Sports Subscale; NAHS, Non-Arthritic Hip Score; iHOT-33, International Hip Outcome Tool-33; VAS, visual analog scale.

**Table A5.** Frequency of HS<sub>Sub</sub> and MC<sub>Sub</sub> Patients Achieving MCID and PASS Thresholds\*

|                 |           | MCID                                |                                     |      | PASS      |                                     |                                     |                   |
|-----------------|-----------|-------------------------------------|-------------------------------------|------|-----------|-------------------------------------|-------------------------------------|-------------------|
|                 | Threshold | HS <sub>Sub</sub> Cohort % Achieved | MC <sub>Sub</sub> Cohort % Achieved | P    | Threshold | HS <sub>Sub</sub> Cohort % Achieved | MC <sub>Sub</sub> Cohort % Achieved | P                 |
| <b>12 Month</b> |           |                                     |                                     |      |           |                                     |                                     |                   |
| <i>n</i>        |           | <b>39</b>                           | <b>44</b>                           |      |           | <b>39</b>                           | <b>44</b>                           |                   |
| mHHS            | Δ ≥6.9    | 86.8%                               | 90.7%                               | .728 | ≥84.8     | 47.4%                               | 65.1%                               | .108              |
| HOS-ADL         | Δ ≥8.8    | 64.1%                               | 68.2%                               | .695 | ≥89.7     | 53.8%                               | 84.1%                               | .003 <sup>†</sup> |
| HOS-SS          | Δ ≥13.9   | 82.1%                               | 81.4%                               | .939 | ≥72.2     | 56.4%                               | 76.7%                               | .050 <sup>†</sup> |
| NAHS            | Δ ≥9.1    | 82.1%                               | 72.7%                               | .313 | ≥81.9     | 69.2%                               | 88.6%                               | .029 <sup>†</sup> |
| iHOT-33         | Δ ≥15.1   | 78.9%                               | 79.5%                               | .947 | ≥69.1     | 63.2%                               | 86.4%                               | .015 <sup>†</sup> |
| <b>24 Month</b> |           |                                     |                                     |      |           |                                     |                                     |                   |
| <i>n</i>        |           | <b>36</b>                           | <b>42</b>                           |      |           | <b>36</b>                           | <b>42</b>                           |                   |
| mHHS            | Δ ≥9.2    | 88.9%                               | 90.5%                               | .999 | ≥83.3     | 58.3%                               | 85.7%                               | .007 <sup>†</sup> |
| HOS-ADL         | Δ ≥9.7    | 61.1%                               | 76.2%                               | .150 | ≥88.2     | 66.7%                               | 90.5%                               | .009 <sup>†</sup> |
| HOS-SS          | Δ ≥14.3   | 83.3%                               | 88.1%                               | .547 | ≥76.4     | 61.1%                               | 78.6%                               | .092              |
| NAHS            | Δ ≥8.3    | 83.3%                               | 85.7%                               | .771 | ≥85.6     | 63.9%                               | 88.1%                               | .011 <sup>†</sup> |
| iHOT-33         | Δ ≥13.9   | 83.3%                               | 92.9%                               | .189 | ≥72.2     | 58.3%                               | 83.3%                               | .014 <sup>†</sup> |
| <b>5 Year</b>   |           |                                     |                                     |      |           |                                     |                                     |                   |
| <i>n</i>        |           | <b>21</b>                           | <b>31</b>                           |      |           | <b>21</b>                           | <b>31</b>                           |                   |
| mHHS            | Δ ≥11.4   | 81.0%                               | 80.6%                               | .999 | ≥83.6     | 71.4%                               | 77.4%                               | .624              |
| HOS-ADL         | Δ ≥10.2   | 71.4%                               | 58.1%                               | .326 | ≥92.2     | 71.4%                               | 71.0%                               | .971              |
| HOS-SS          | Δ ≥15.2   | 85.7%                               | 80.6%                               | .724 | ≥80.9     | 61.9%                               | 64.5%                               | .848              |
| NAHS            | Δ ≥12.6   | 81.0%                               | 71.0%                               | .415 | ≥81.9     | 81.0%                               | 83.9%                               | .999              |
| iHOT-33         | Δ ≥15.1   | 85.7%                               | 77.4%                               | .721 | ≥74.3     | 52.4%                               | 74.2%                               | .105              |

\*Note 12-month, 24-month, and 5-year MCID/PASS analyses include patients with minimum 3-year follow-up and available follow-up at these discrete time points. <sup>†</sup>A significant difference between groups. HS<sub>Sub</sub>, hip-spine subgroup; MC<sub>Sub</sub>, matched control subgroup; MCID, minimal clinically important difference; PASS, patient acceptable symptom state; mHHS, modified Harris Hip Score; HOS-ADL, Hip Outcome Score-Activities of Daily Living; HOS-SS, Hip Outcome Score-Sports Subscale; NAHS, Non-Arthritic Hip Score; iHOT-33, International Hip Outcome Tool-33.
